# Supplementary material for: Genome-wide identification and expression analysis of the HSP70 gene family in Artemisia annua L. under heat stress
Source: PeerJ. 2025 Oct 3;13:e19866. doi: 10.7717/peerj.19866 (PMC12499563; doi:10.7717/peerj.19866)
Supplement: Supplemental Information 1 [file peerj-13-19866-s001.xlsx]

## Sheet: Supplemental table S1
TableS1 Primers used in gene expression validation
Gene	Forward sequence (5'-3')	Reverse sequence (5'-3')	Length (bp)
AaActin	CCAGGCTGTTCAGTCTCTGTAT	CGCTCGGATTGGATCTTCATCA	reference genes
AaHSP70_03	ACGACCCACAAACACAGAAA	AGCCGGCACAGTAATAACAG	200bp
AaHSP70_09	AAGTTGAAGTTCCAGTGACC	AGCATTATCTCCTGTATCCG	189bp
AaHSP70_11	AATGACCCGTGTTCCTAAAGT	CCAAGCGTCTCAATACCAAGT	158bp
AaHSP70_25	TCACTGTCCCTGCCTACTTCAA	AAATCAGCACGTTCTTCTCACC	168bp
AaHSP70_27	ATGTCTGGAAAAGGTGAAGGA	ACCAATGAGCCTCTCAGTGTC	165bp
AaHSP70_31	GGTAGAGGGGAAGTTGACAG	GACCCAGAAGCCTTAGGAGC	186bp
AaHSP70_40	AAGTCCAACGGGATTCTAAG	GTGACAACAGCATCCTTAAT	152bp
AaHSP70_43	TTGGTGGTGTGATGACAAAGA	AAGACGGAAGCTACCGAGAGA	167bp
AaHSP70_44	CTTGCCTTTCATCACAGC	GAACACGGGTCATTCCAC	194bp
AaHSP70_45	ACTAAGGAGGCACTTGAGTGGC	TGTTCATCATCGTCTTCGGTTG	170bp
