# Supplementary material for: Genome-wide identification and expression analysis of the HSP70 gene family in Artemisia annua L. under heat stress
Source: PeerJ. 2025 Oct 3;13:e19866. doi: 10.7717/peerj.19866 (PMC12499563; doi:10.7717/peerj.19866)
Supplement: Supplemental Information 2 [file peerj-13-19866-s002.xlsx]

## Sheet: Supplemental table S2
Table S2 The basic information about the HSP70 genes in A. annua LQ-9 haplotype 0
Gene name	Gene ID	Gene length	cDNA length	CDS length	Prep length	Exon number	Molecular weight(kDa)	Theoretical pI	GRAVY	Subcellular localization
AaHSP70_01	chr1g00059171	3578	2388	1929	642	3	72.01	9.01	-0.358	Mitochondrion.
AaHSP70_02	chr1g00068791	2961	2309	1845	614	2	68.12	7.01	-0.34	Chloroplast. Nucleus.
AaHSP70_03	chr1g00083971	6126	2489	2034	677	6	72.21	5.89	-0.305	Mitochondrion.
AaHSP70_04	chr1g00098411	3479	2056	2022	673	6	72.36	5.68	-0.318	Mitochondrion.
AaHSP70_05	chr2g00288151	3442	2168	1866	621	2	69.3	8.14	-0.292	Chloroplast.
AaHSP70_06	chr2g00297991	2229	2169	1848	615	2	69	7.48	-0.32	Chloroplast.
AaHSP70_07	chr2g00298021	2320	2225	1848	615	2	68.68	6.71	-0.346	Chloroplast. Nucleus.
AaHSP70_08	chr2g00301651	2974	2043	1884	627	2	68.2	5.3	-0.227	Chloroplast.
AaHSP70_09	chr2g00331881	5031	3151	2541	846	10	93.66	5.1	-0.45	Mitochondrion.
AaHSP70_10	chr2g00332141	5824	3117	2499	832	10	92.06	5.17	-0.449	Mitochondrion.
AaHSP70_11	chr2g00358181	3956	2553	2043	680	6	72.94	5.54	-0.307	Mitochondrion.
AaHSP70_12	chr3g00506801	4272	2128	1677	558	6	61.32	9.22	-0.153	Cytoplasm. Endoplasmic reticulum. Mitochondrion. Nucleus.
AaHSP70_13	chr3g00515161	2712	2196	1902	633	2	70.36	6.34	-0.315	Endoplasmic reticulum.
AaHSP70_14	chr3g00515221	6619	2237	1884	627	2	69.67	5.59	-0.236	Endoplasmic reticulum.
AaHSP70_15	chr3g00531921	6927	3124	2649	882	14	98.45	5.3	-0.478	Mitochondrion.
AaHSP70_16	chr3g00570681	2894	1983	1748	581	2	71.41	5.17	-0.423	Mitochondrion.
AaHSP70_17	chr3g00575641	2854	2169	1848	615	3	68.5	8.18	-0.325	Mitochondrion.
AaHSP70_18	chr3g00575651	3086	2011	1848	615	2	68.24	7	-0.313	Mitochondrion.
AaHSP70_19	chr3g00576761	1991	1908	1878	625	2	69.24	6.82	-0.265	Chloroplast.
AaHSP70_20	chr4g00699371	2525	2074	1866	621	2	69.43	8.3	-0.376	Chloroplast.
AaHSP70_21	chr4g00700051	4291	2277	1854	617	2	68.73	5.35	-0.309	Cytoplasm. Endoplasmic reticulum. Mitochondrion. Nucleus.
AaHSP70_22	chr4g00700061	5095	2365	1842	613	2	68.48	5.31	-0.273	Mitochondrion. Nucleus.
AaHSP70_23	chr4g00706591	2615	2209	1905	634	3	70.64	6.61	-0.213	Endoplasmic reticulum. Mitochondrion.
AaHSP70_24	chr4g00710331	2023	1730	1560	519	2	57	8.12	-0.199	Chloroplast.
AaHSP70_25	chr4g00740111	3129	2360	1947	648	2	70.93	5.28	-0.452	Endoplasmic reticulum. Mitochondrion.
AaHSP70_26	chr4g00740131	2920	2374	1944	647	2	70.8	5.29	-0.412	Chloroplast.
AaHSP70_27	chr4g00740241	3443	2374	1944	647	2	71.22	5.25	-0.449	Mitochondrion.
AaHSP70_28	chr4g00740541	3677	2252	1941	646	2	70.82	5.04	-0.435	Chloroplast. Nucleus.
AaHSP70_29	chr4g00740561	3392	2204	1941	646	2	70.81	5.04	-0.439	Chloroplast. Nucleus.
AaHSP70_30	chr4g00747671	3061	1983	1866	621	2	68.52	8.26	-0.243	Mitochondrion.
AaHSP70_31	chr5g00819771	5134	2433	2100	699	8	74.64	5.27	-0.306	Chloroplast.
AaHSP70_32	chr5g00842431	3456	2085	1857	618	2	68.84	5.85	-0.292	Mitochondrion. Nucleus.
AaHSP70_33	chr5g00869411	4071	2540	1986	661	8	72.6	5.05	-0.411	Endoplasmic reticulum. Nucleus.
AaHSP70_34	chr5g00860951	2052	1937	1599	532	2	58.43	5.58	-0.252	Endoplasmic reticulum. Mitochondrion.
AaHSP70_35	chr6g00965601	2767	2535	1860	619	3	68.72	5.95	-0.275	Mitochondrion.
AaHSP70_36	chr6g01008221	7255	2670	1857	618	3	68.39	6.71	-0.318	Mitochondrion.
AaHSP70_37	chr6g01008251	2154	2074	1857	618	2	68.39	6.71	-0.318	Mitochondrion.
AaHSP70_38	chr6g01020301	5904	3503	2973	990	11	111.36	5.44	-0.585	Mitochondrion.
AaHSP70_39	chr6g01020321	4511	3211	2931	976	8	111.04	5.86	-0.772	Mitochondrion. Nucleus.
AaHSP70_40	chr6g01026721	4124	2416	1983	660	7	72.79	5.04	-0.43	Endoplasmic reticulum. Nucleus
AaHSP70_41	chr6g01026771	4022	2203	1992	663	7	73.34	5.04	-0.446	Endoplasmic reticulum. Nucleus.
AaHSP70_42	chr7g01233071	1963	1901	1668	555	1	62.53	8.73	-0.276	Mitochondrion.
AaHSP70_43	Super-Scaffold_100123g01463701	6667	2607	2073	690	8	73.61	5.05	-0.287	Chloroplast.
AaHSP70_44	unctg_1915g01633321	2740	2219	2001	666	5	70.72	5.28	-0.319	Mitochondrion.
AaHSP70_45	unctg_2054g01646851	4120	2507	1959	652	8	71.94	5.29	-0.433	Cytoplasm. Endoplasmic reticulum. Mitochondrion. Nucleus.
AaHSP70_46	unctg_4319g01618231	11131	2850	2502	833	11	94.08	6	-0.529	Mitochondrion.
AaHSP70_47	unctg_775g01571981	3206	2739	1860	619	3	69.14	6.18	-0.235	Endoplasmic reticulum.
