# Supplementary material for: Genome-wide identification and expression analysis of the HSP70 gene family in Artemisia annua L. under heat stress
Source: PeerJ. 2025 Oct 3;13:e19866. doi: 10.7717/peerj.19866 (PMC12499563; doi:10.7717/peerj.19866)
Supplement: Supplemental Information 3 [file peerj-13-19866-s003.xlsx]

## Sheet: Supplemental table S3
Table S3 Duplication types, Ka/Ks ratio calculations
GenePair	Duplication types	Identity (%)	Gene alignment coverage (%)	Ka	Ks	Ka_Ks
AaHSP70_03-AaHSP70_04	DSD	75.624	100	0.165751	1.79523	0.0923285
AaHSP70_06-AaHSP70_07	TD	87.642	100	0.0698306	0.253165	0.275831
AaHSP70_09-AaHSP70_10	DSD	82.527	100	0.0810827	0.677306	0.119714
AaHSP70_13-AaHSP70_14	DSD	84.53	99.37	0.0820245	0.255718	0.320761
AaHSP70_13-AaHSP70_19	DSD	73.077	99.05	0.165213	0.616335	0.268057
AaHSP70_14-AaHSP70_19	DSD	73.506	98.72	0.163904	0.639066	0.256474
AaHSP70_17-AaHSP70_18	TD	90.732	100	0.0443532	0.129225	0.343225
AaHSP70_17-AaHSP70_37	DSD	74.798	99.91	0.147165	0.559682	0.262945
AaHSP70_20-AaHSP70_21	DSD	73.366	98.55	0.176416	0.831211	0.212239
AaHSP70_20-AaHSP70_22	DSD	72.386	98.87	0.184611	0.753163	0.245114
AaHSP70_21-AaHSP70_22	TD	93.617	99.35	0.0351271	0.117284	0.299504
AaHSP70_25-AaHSP70_27	TD	96.472	100.08	0.014759	0.403674	0.0365616
AaHSP70_25-AaHSP70_26	TD	96.759	99.92	0.0157962	0.150027	0.105289
AaHSP70_25-AaHSP70_29	DSD	89.831	100	0.0732659	1.64792	0.0444597
AaHSP70_25-AaHSP70_28	DSD	89.676	100	0.0721974	1.89082	0.0381832
AaHSP70_26-AaHSP70_27	TD	96.774	100.16	0.0144276	0.385318	0.0374432
AaHSP70_26-AaHSP70_28	DSD	89.815	99.92	0.0744876	2.03592	0.0365867
AaHSP70_26-AaHSP70_29	DSD	89.66	99.92	0.0744702	1.78114	0.0418103
AaHSP70_27-AaHSP70_28	DSD	91.091	100.08	0.0642308	2.47764	0.0259241
AaHSP70_27-AaHSP70_29	TD	90.937	100.08	0.0642159	1.90442	0.0337194
AaHSP70_28-AaHSP70_29	TD	99.845	100	0.00133348	0.209966	0.00635095
AaHSP70_40-AaHSP70_41	TD	89.157	99.62	0.0518466	0.508291	0.102002
AaHSP70_01-AaHSP70_07	DSD	74.129	95.99	0.16424	0.699609	0.23476
AaHSP70_01-AaHSP70_06	DSD	70.957	96.46	0.187031	0.736893	0.25381
AaHSP70_02-AaHSP70_07	DSD	71.895	99.43	0.170109	0.820936	0.207213
AaHSP70_02-AaHSP70_06	DSD	70.425	99.43	0.184687	0.906952	0.203635
AaHSP70_03-AaHSP70_11	WGD	90.015	100.07	0.0617055	0.889715	0.0693543
AaHSP70_03-AaHSP70_44	DSD	90.592	98.52	3.53422	1.75584	2.01283
AaHSP70_03-AaHSP70_04	DSD	75.624	100.59	0.165751	1.79523	0.0923285
AaHSP70_04-AaHSP70_11	DSD	76.505	100.37	0.155574	NaN	NaN
AaHSP70_04-AaHSP70_44	DSD	78.067	97.76	3.34693	1.69119	1.97903
AaHSP70_05-AaHSP70_20	DSD	74.11	99.19	0.15842	0.602923	0.262754
AaHSP70_05-AaHSP70_21	DSD	71.593	98.39	0.185199	0.750315	0.246828
AaHSP70_05-AaHSP70_22	DSD	71.429	98.71	0.186428	0.671772	0.277517
AaHSP70_05-AaHSP70_32	DSD	70.376	98.63	0.184798	0.694572	0.26606
AaHSP70_05-AaHSP70_42	DSD	72.376	92.47	0.180723	0.676595	0.267107
AaHSP70_06-AaHSP70_23	DSD	72.951	97.38	0.17121	0.660596	0.259175
AaHSP70_07-AaHSP70_23	DSD	73.934	97.38	0.161917	0.684	0.236721
AaHSP70_07-AaHSP70_30	DSD	71.074	97.74	0.187458	0.807761	0.232071
AaHSP70_11-AaHSP70_44	DSD	99.696	98.31	3.60076	1.71269	2.10241
AaHSP70_12-AaHSP70_35	DSD	70.817	87.41	0.183906	0.87002	0.211382
AaHSP70_13-AaHSP70_47	DSD	73.676	99.37	0.157556	0.669556	0.235314
AaHSP70_14-AaHSP70_47	DSD	73.077	99.84	0.160984	0.637689	0.252449
AaHSP70_16-AaHSP70_27	DSD	91.586	94.79	0.0658231	2.90713	0.022642
AaHSP70_16-AaHSP70_25	DSD	88.361	100.23	0.0680392	2.78518	0.024429
AaHSP70_16-AaHSP70_26	DSD	90.939	95.08	0.065867	NaN	NaN
AaHSP70_16-AaHSP70_29	DSD	86.064	100.23	0.0932735	1.80072	0.0517979
AaHSP70_16-AaHSP70_28	DSD	86.217	100.08	0.0920917	1.89411	0.0486201
AaHSP70_17-AaHSP70_36	DSD	74.798	99.92	0.147165	0.559682	0.262945
AaHSP70_18-AaHSP70_37	DSD	74.392	99.76	0.153421	0.602974	0.25444
AaHSP70_18-AaHSP70_36	DSD	74.392	99.76	0.153421	0.602974	0.25444
AaHSP70_19-AaHSP70_47	DSD	77.28	100.32	0.137399	0.59588	0.230582
AaHSP70_20-AaHSP70_32	DSD	70.473	98.63	0.185795	0.78199	0.237593
AaHSP70_20-AaHSP70_42	DSD	72.376	92.3	0.179485	0.624911	0.287216
AaHSP70_21-AaHSP70_32	DSD	79.545	99.76	0.117862	0.630981	0.186792
AaHSP70_21-AaHSP70_42	DSD	70.073	93.44	0.185728	0.708516	0.262137
AaHSP70_22-AaHSP70_32	DSD	80.921	98.78	0.110329	0.612994	0.179983
AaHSP70_31-AaHSP70_43	DSD	82.895	98.06	0.124917	2.20112	0.0567517
AaHSP70_33-AaHSP70_40	DSD	94.251	99.77	0.0277456	0.852346	0.032552
AaHSP70_33-AaHSP70_45	DSD	91.074	100.16	0.0442549	0.883434	0.0500942
AaHSP70_33-AaHSP70_41	WGD	87.632	99.7	0.0618476	0.863229	0.0716468
AaHSP70_40-AaHSP70_45	DSD	96.364	100.39	0.017178	0.0261096	0.657919
AaHSP70_41-AaHSP70_45	DSD	85.994	100.01	0.0693049	0.537463	0.128948
