# Supplementary material for: Genome-wide identification and expression analysis of the HSP70 gene family in Artemisia annua L. under heat stress
Source: PeerJ. 2025 Oct 3;13:e19866. doi: 10.7717/peerj.19866 (PMC12499563; doi:10.7717/peerj.19866)
Supplement: Supplemental Information 4 [file peerj-13-19866-s004.xlsx]

## Sheet: Supplemental table S4
Table S4 Statistic of RNA-seq data
Sample	Read number	Total data (Gb)	GC content (%)	Q20 (%)	Q30 (%)
A1-25-0h	31945043	4.79	43.08	98.89	96.17
A1-25-3h	33618476	5.04	42.95	99.07	96.8
A1-25-6h	27026560	4.05	43.42	98.8	94.75
A1-25-12h	32065206	4.81	43.53	98.69	95.85
A1-25-24h	29791616	4.47	43.64	99.72	96.01
A1-40-0h	28409879	4.26	44.72	98.45	95.19
A1-40-3h	35157804	5.27	43.52	98.46	95.23
A1-40-6h	35806068	5.37	42.56	99.02	96.64
A1-40-12h	30695808	4.6	42.91	98.63	95.59
A1-40-24h	31033703	4.66	42.63	98.59	95.57
A2-40-0h	31473029	4.72	43.7	98.63	95.71
A2-40-3h	33105735	4.97	43.67	99.13	97.01
A2-40-6h	29455662	4.42	43.12	98.46	95.19
A2-40-12h	26336175	3.95	43.08	98.34	94.85
A2-40-24h	33652508	5.05	43.02	99.03	96.67
