# Supplementary material for: Genome-wide identification and expression analysis of the HSP70 gene family in Artemisia annua L. under heat stress
Source: PeerJ. 2025 Oct 3;13:e19866. doi: 10.7717/peerj.19866 (PMC12499563; doi:10.7717/peerj.19866)
Supplement: Supplemental Information 5 [file peerj-13-19866-s005.xlsx]

## Sheet: Supplemental table S5
TableS5 DEGs enriched to heat stress and reactive oxygen pathways in GO enrichment
Enriched pathways	cellular response to heat	obsolete positive regulation of transcription from RNA polymerase II promoter in response to heat stress	response to hydrogen peroxide	response to reactive oxygen species
Gene ID	chr1g00038191	chr1g00038191	AaHSP70_25	AaHSP70_25
Gene ID	chr1g00078141	chr1g00139411	AaHSP70_27	AaHSP70_27
Gene ID	chr1g00078151	chr2g00307321	chr1g00023081	chr1g00023081
Gene ID	chr1g00078181	chr2g00394501	chr1g00024771	chr1g00024771
Gene ID	chr1g00094461	chr2g00407251	chr1g00033161	chr1g00084381
Gene ID	chr1g00113431	chr3g00545771	chr1g00048991	chr1g00114171
Gene ID	chr1g00139411	chr3g00545781	chr1g00083241	chr1g00159161
Gene ID	chr1g00201661	chr3g00559781	chr1g00083251	chr2g00292441
Gene ID	chr2g00253161	chr4g00682871	chr1g00099031	chr2g00327221
Gene ID	chr2g00268891	chr4g00687721	chr1g00114171	chr2g00382611
Gene ID	chr2g00307321	chr5g00865621	chr1g00119661	chr2g00382631
Gene ID	chr2g00388231	chr5g00865631	chr1g00134801	chr2g00382711
Gene ID	chr2g00407251	chr5g00865641	chr2g00292441	chr2g00421401
Gene ID	chr2g00421491	chr5g00872111	chr2g00327221	chr2g00421411
Gene ID	chr3g00542731	chr5g00927741	chr2g00342071	chr2g00421421
Gene ID	chr3g00545771	chr6g00956911	chr2g00382611	chr2g00421431
Gene ID	chr3g00545781	chr6g00995571	chr2g00382631	chr2g00421461
Gene ID	chr3g00558931	chr7g01245071	chr2g00382711	chr2g00421471
Gene ID	chr3g00559781	chr7g01245091	chr2g00421401	chr2g00421481
Gene ID	chr4g00643901	chr8g01289701	chr2g00421411	chr3g00470731
Gene ID	chr4g00682871	chr8g01289721	chr2g00421421	chr3g00470741
Gene ID	chr4g00687721	unctg_4446g01505591	chr2g00421431	chr3g00549541
Gene ID	chr4g00701451		chr2g00421461	chr3g00556541
Gene ID	chr4g00775951		chr2g00421471	chr3g00568511
Gene ID	chr5g00852941		chr2g00421481	chr3g00568521
Gene ID	chr5g00865621		chr3g00537561	chr3g00568551
Gene ID	chr5g00865631		chr3g00549541	chr3g00568561
Gene ID	chr5g00865641		chr3g00556541	chr3g00568571
Gene ID	chr5g00872111		chr3g00568511	chr3g00568591
Gene ID	chr5g00927741		chr3g00568521	chr4g00616631
Gene ID	chr6g00956911		chr3g00568551	chr4g00616731
Gene ID	chr6g00974081		chr3g00568561	chr4g00687721
Gene ID	chr6g00995571		chr3g00568571	chr4g00740861
Gene ID	chr6g01023071		chr3g00568591	chr4g00757641
Gene ID	chr6g01084801		chr3g00571281	chr5g00787431
Gene ID	chr7g01245071		chr4g00616631	chr5g00884181
Gene ID	chr7g01245091		chr4g00616731	chr6g01085191
Gene ID	chr8g01281391		chr4g00740861	chr7g01230251
Gene ID	chr8g01289701		chr4g00776361	chr9g01363911
Gene ID	chr8g01289721		chr5g00787431	SuperScaffold_100123g01459661
Gene ID	chr8g01300051		chr5g00858921	unctg_4692g01589321
Gene ID	chr8g01306051		chr5g00874611
Gene ID	unctg_2799g01633651		chr5g00884181
Gene ID	unctg_4446g01505591		chr6g00968731
Gene ID	unctg_5852g01628401		chr6g00993001
Gene ID			chr6g00999061
Gene ID			chr6g01001541
Gene ID			chr6g01079181
Gene ID			chr6g01085191
Gene ID			chr7g01245071
Gene ID			chr7g01245091
Gene ID			chr8g01282341
Gene ID			chr9g01363911
Gene ID			chr9g01370121
Gene ID			chr9g01406941
Gene ID			SuperScaffold_100123g01459661
Gene ID			unctg_3096g01681721
Gene ID			unctg_4692g01589321
Gene ID			unctg_5515g01621041
