# Supplementary material for: Genome-wide identification and expression analysis of the HSP70 gene family in Artemisia annua L. under heat stress
Source: PeerJ. 2025 Oct 3;13:e19866. doi: 10.7717/peerj.19866 (PMC12499563; doi:10.7717/peerj.19866)
Supplement: Supplemental Information 6 [file peerj-13-19866-s006.xlsx]

## Sheet: Sheet1
Relative experssion levels of ten AaHSP70 genes
Gene_ID	Treatment	A1-25			A1-40			A2-40
AaHSP70_03	0h	1.05439	0.918466	1.0326	15.6673	15.9888	15.2232	11.6928	11.5844	10.3033
	3h	0.978449	1.02109	1.00092	7.87886	7.68578	7.63706	20.3933	18.5354	17.6083
	24h	1.01264	0.983523	1.00406	10.3374	10.1022	9.80688	6.7979	6.4507	6.38169
AaHSP70_09	0h	1.00982	0.992128	0.998133	35.544	35.378	33.5119	27.0293	24.1852	23.4191
	3h	0.985312	1.01513	0.999783	43.7271	39.0322	46.5418	74.1205	135.367	64.3394
	24h	0.933964	1.00692	1.06335	18.5741	19.1467	18.6417	8.94551	8.39764	11.0437
AaHSP70_11	0h	1.12965	0.903308	0.979985	8.18996	8.67827	8.53909	6.42824	6.59582	5.98514
	3h	0.956144	1.07047	0.977018	20.4074	18.361	18.2499	22.1231	19.2277	20.8061
	24h	1.00848	1.00845	0.98329	7.79991	7.89961	7.64305	4.90106	4.40847	4.19629
AaHSP70_25	0h	1.06501	0.921233	1.01925	7.5437	7.40829	7.46752	7.12679	7.12486	7.14735
	3h	0.979084	1.03267	0.989052	32.9237	35.3524	32.3963	25.237	25.3875	24.1733
	24h	0.990281	0.998846	1.01098	3.58161	3.50586	3.33219	2.16967	2.14037	2.16091
AaHSP70_27	0h	0.974169	1.03863	0.988336	137.685	162.318	123.209	146.746	114.424	130.054
	3h	0.972422	1.02038	1.00782	418.85	400.532	377.042	276.477	297.341	339.874
	24h	0.98132	1.01781	1.00121	58.948	49.4443	52.805	31.5604	31.9418	29.9956
AaHSP70_31	0h	1.02643	1.09448	0.89015	99.7747	109.834	100.863	167.341	170.332	154.612
	3h	0.965492	1.00048	1.03524	90.8951	99.9169	89.0705	226.415	226.098	259.471
	24h	1.04069	0.88273	1.08856	424.852	405.328	396.01	279.013	269.137	250.861
AaHSP70_40	0h	1.06125	1.05649	0.891898	40.5239	37.6718	43.3191	36.0601	37.3825	35.3505
	3h	0.956541	1.08695	0.961809	13.5097	13.0228	15.6074	24.3655	23.043	22.7032
	24h	1.04398	0.994409	0.963257	24.5269	23.9039	22.7046	11.3192	8.56414	9.90379
AaHSP70_43	0h	0.998053	0.949827	1.05488	3.25338	3.36317	3.11427	2.83171	3.08652	2.91632
	3h	1.00589	0.991904	1.00225	3.14965	2.94835	3.13251	6.5308	6.16967	6.18672
	24h	0.987777	1.04337	0.970289	5.43687	5.4169	5.17043	2.53091	2.35754	2.28433
AaHSP70_44	0h	1.04065	0.965547	0.995226	9.8816	10.7388	9.91436	8.3549	7.88146	8.84756
	3h	0.968572	0.998499	1.034	17.9376	17.1948	17.2131	20.3352	20.7263	19.4571
	24h	0.986029	1.05528	0.961044	7.89065	6.84548	8.1531	5.10221	3.96647	4.50335
AaHSP70_45	0h	0.979641	1.0364	0.984928	17.8458	19.3995	18.973	17.4507	15.9721	15.2892
	3h	0.977984	1.01054	1.01185	10.7131	10.9257	10.7374	24.5979	22.558	22.2956
	24h	1.05745	1.00137	0.944377	20.33	21.884	22.6581	11.8513	11.0449	10.8447
Experimental Methodology Sample Collection The assays were carried out in the investigator's lab. Approximately 100 mg of leaves tissue was processed for each sample. Macrodissection was used to isolate specific areas of interest from the leaves samples.
Nucleic Acid Extraction Procedure:RNA extraction was performed using FastPure Plant Total RNA Isolation Kit (Vazyme) following the manufacturer’s protocol. DNase Treatment:DNase treatment was performed to remove genomic DNA contamination. Contamination assessment:Contamination was assessed using no-RT controls in qPCR. Quantification: RNA quantity and purity were measured using a NanoDrop spectro…
REVERSE TRANSCRIPTION Reaction Conditions:Reverse transcription was performed using HiScript III 1st Strand cDNA Synthesis Kit (+gDNA wiper) (Vazyme,catalog number R312-01). 1 µg of RNA was used in a 20 µL reaction volume. Random hexamers were used at a concentration of 50 µM. PrimeScript™ RT enzyme was used at the manufacturer-recommended concentration. Temperature and Time: The reverse transcri…
qPCR TARGET INFORMATION Multiplex assays were not performed in this study. Sequence accession numbers for target genes were provided in the supplementary materials.(On TableS1) Amplicons were located within exons to avoid amplification of genomic DNA. Primers were designed using Primer-BLAST to ensure specificity. Potential pseudogenes and homologs were checked using BLAST analysis. Primer sequen…
qPCR PROTOCOL Reactions were carried out in a final volume of 20 µL, containing 10 µL of SYBR Green Master Mix, 0.4µL of each primer (10 µM), 1 µL of cDNA, and 8.2 µL of nuclease-free water. Primer, (probe), Mg.Primer concentration was 10 µM, Mg++ concentration was 3 mM, and dNTP concentration was 200 µM each. Taq polymerase was used at a concentration of 1.25 U per 20 µL reaction. The buffer com…
qPCR VALIDATION Primer optimization was performed using gradient PCR to determine the optimal annealing temperature. Specificity was confirmed by melt curve analysis and gel electrophoresis of PCR products. The Cq value of the non-template control (NTC) was greater than 35, indicating no contamination. Standard curves were generated with a slope of -3.5 and y-intercept of 27. PCR efficiency was c…
DATA ANALYSIS qPCR reactions were performed using the Applied Biosystems ABI 7500 PCR system. Cq values were determined using the threshold cycle method. Outliers were identified using Grubbs' test and excluded from analysis. NTC results confirmed no contamination throughout the experiments. Reference genes were selected based on their stable expression across samples, with at least three referen…
