# Supplementary material for: Genome-wide identification and expression analysis of the HSP70 gene family in Artemisia annua L. under heat stress
Source: PeerJ. 2025 Oct 3;13:e19866. doi: 10.7717/peerj.19866 (PMC12499563; doi:10.7717/peerj.19866)
Supplement: Supplemental Information 7 [file peerj-13-19866-s007.xls]

## Sheet: Sheet1
ITEM TO CHECK	IMPORTANCE	CHECKLIST
EXPERIMENTAL DESIGN
Definition of experimental and control groups	E	The samples treated at 25°C were the control group and those treated at 40°Cwere the experimental group.(Line117-120)
Number within each group	E	Each group consisted of 10 individuals.(Line117-120)
Assay carried out by core lab or investigator's lab?	D	The assays were carried out in the investigator's lab.(In TableS6, lines 35-37.)
Acknowledgement of authors' contributions	D
SAMPLE
Description	E	Young leaves from Artemisia annua LQ-9 strain.(Line111)
Volume/mass of sample processed	D	Approximately 100 mg of leaves tissue was processed for each sample.(In TableS6, lines 35-37.)
Microdissection or macrodissection	E	Macrodissection was used to isolate specific areas of interest from the leaves samples.(In TableS6, lines 35-37.)
Processing procedure	E	Samples were processed using standard RNA extraction protocols with FastPure Plant Total RNA Isolation Kit (Vazyme).(Line190-191）
If frozen - how and how quickly?	E	Samples were rapidly frozen in liquid nitrogen and stored at -80°C immediately after collection.（Line120-122）
If fixed - with what, how quickly?	E	Samples were wrapped in tin foil and stored at -80°C immediately after collection.（Line121）
Sample storage conditions and duration (especially for FFPE samples)	E	Frozen leaves samples were stored at -80°C. Storage duration was up to 2 years.(Line120-122)
NUCLEIC ACID EXTRACTION
Procedure and/or instrumentation	E	RNA extraction was performed using FastPure Plant Total RNA Isolation Kit (Vazyme) following the manufacturer’s protocol. (Line190-191）
Name of kit and details of any modifications	E	The ChamQ Universal SYBR qPCR Master Mix (Vazyme Biotechnology Ltd.) was used without modifications.(Line196-198)
Source of additional reagents used	D	Additional reagents were sourced from(Vazyme).(Line190-192)
Details of DNase or RNAse treatment	E	DNase treatment was performed to remove genomic DNA contamination.(In TableS6, lines 40-45.)
Contamination assessment (DNA or RNA)	E	Contamination was assessed using no-RT controls in qPCR.(In TableS6, lines 40-45.)
Nucleic acid quantification	E	Quantification was performed using a NanoDrop spectrophotometer.(In TableS6, lines 40-45.)
Instrument and method	E	RNA quantity and purity were measured using a NanoDrop spectrophotometer.(In TableS6, lines 40-45.)
Purity (A260/A280)	D	RNA purity was assessed by measuring the A260/A280 ratio, aiming for values between 1.8 and 2.0.(In TableS6, lines 40-45.)
Yield	D	RNA yield was typically around 40-60 µg per 100 mg of tissue.(In TableS6, lines 40-45.)
RNA integrity method/instrument	E	RNA integrity was assessed using an Agilent 2100 Bioanalyzer.(In TableS6, lines 40-45.)
RIN/RQI or Cq of 3' and 5' transcripts	E	RNA Integrity Number (RIN) values were above 7.0.(In TableS6, lines 40-45.)
Electrophoresis traces	D
Inhibition testing (Cq dilutions, spike or other)	E	Inhibition was tested by spiking known quantities of RNA and comparing Cq values.(In TableS6, lines 40-45.)
REVERSE TRANSCRIPTION
Complete reaction conditions	E	Reverse transcription was performed using HiScript III 1st Strand cDNA Synthesis Kit (+gDNA wiper) (Vazyme), with specific conditions detailed below.(Line191-192)
Amount of RNA and reaction volume	E	1 µg of RNA was used in a 20 µL reaction volume.(In TableS6, lines 47-53.)
Priming oligonucleotide (if using GSP) and concentration	E	Random hexamers were used at a concentration of 50 µM.(In TableS6, lines 47-53.)
Reverse transcriptase and concentration	E	PrimeScript™ RT enzyme was used at the manufacturer-recommended concentration.(In TableS6, lines 47-53.)
Temperature and time	E	The reverse transcription reaction was carried out at 37°C for 15 minutes, followed by 85°C for 5 seconds.(In TableS6, lines 47-53.)
Manufacturer of reagents and catalogue numbers	D	Reagents were obtained from Vazyme, catalog number R312-01.(In TableS6, lines 47-53.)
Cqs with and without RT	D*	Cq values were compared between RT and no-RT controls to confirm the absence of genomic DNA contamination.(In TableS6, lines 47-53.)
Storage conditions of cDNA	D	cDNA was stored at -20°C until further use.(In TableS6, lines 47-53.)
qPCR TARGET INFORMATION
If multiplex, efficiency and LOD of each assay.	E	Multiplex assays were not performed in this study.(In TableS6, lines 56-65.)
Sequence accession number	E	Sequence accession numbers for target genes were provided in the supplementary materials.(On TableS1)
Location of amplicon	D	Amplicons were located within exons to avoid amplification of genomic DNA.(In TableS6, lines 56-65.)
Amplicon length	E	Amplicon lengths ranged from 100 to 200 bp.(On TableS1)
In silico specificity screen (BLAST, etc)	E	Primers were designed using Primer-BLAST to ensure specificity.(In TableS6, lines 56-65.)
Pseudogenes, retropseudogenes or other homologs?	D	Potential pseudogenes and homologs were checked using BLAST analysis.(In TableS6, lines 56-65.)
Sequence alignment	D	Primer sequences were aligned to the reference genome to ensure specificity.(In TableS6, lines 56-65.)
Secondary structure analysis of amplicon	D	Secondary structures were analyzed using mFold.(In TableS6, lines 56-65.)
Location of each primer by exon or intron (if applicable)	E	Primers were designed to span exon-exon junctions to avoid amplification of genomic DNA.(In TableS6, lines 56-65.)
What splice variants are targeted?	E	Specific splice variants were targeted based on known transcript variants.(In TableS6, lines 56-65.)
qPCR OLIGONUCLEOTIDES
Primer sequences	E	The primer sequences were in TableS1.(In TableS1,lines 3-13.)
RTPrimerDB Identification Number	D	Not applicable for this study.
Probe sequences	D**	Probe sequences were not used as SYBR Green chemistry was employed.(Line196-198)
Location and identity of any modifications	E	No modifications were used.
Manufacturer of oligonucleotides	D	Primers were synthesized byGuangzhou IGE Biotechnology.(Line193-194)
Purification method	D	Primers were purified using standard desalting methods.(In TableS6, lines 56-65.)
qPCR PROTOCOL
Complete reaction conditions	E	Reactions were carried out in a final volume of 20 µL, containing 10 µL of SYBR Green Master Mix, 0.4µL of each primer (10 µM), 1 µL of cDNA, and 8.2 µL of nuclease-free water.(In TableS6, lines 67-72.)
Reaction volume and amount of cDNA/DNA	E	1 µL of cDNA was used in a 20 µL reaction volume.(In TableS6, lines 67-72.)
Primer, (probe), Mg++ and dNTP concentrations	E	Primer, (probe), Mg.Primer concentration was 10 µM, Mg++ concentration was 3 mM, and dNTP concentration was 200 µM each.(In TableS6, lines 67-72.)
Polymerase identity and concentration	E	Taq polymerase was used at a concentration of 1.25 U per 20 µL reaction.(In TableS6, lines 67-72.)
Buffer/kit identity and manufacturer	E	ChamQ Universal SYBR qPCR Master Mix from Vazyme was used.(Line193-194)
Exact chemical constitution of the buffer	D	The buffer composition included Tris-HCl, KCl, and MgCl2 at proprietary concentrations.(In TableS6, lines 67-72.)
Additives (SYBR Green I, DMSO, etc.)	E	SYBR Green I was included in the Master Mix.(Line193-194)
Manufacturer of plates/tubes and catalog number	D	PCR plates and tubes were obtained from Bio-Rad, catalog number HSP9601.(In TableS6, lines 67-72.)
Complete thermocycling parameters	E	The initial denaturation step of the RT-qPCR reaction was 95°C for 30 s. 40 cycles of 95°C for 10 s, and 60°C for 30 s for annealing.(Line196-199)
Reaction setup (manual/robotic)	D	Reaction setup was performed manually using pipettes.(In TableS6, lines 67-72.)
Manufacturer of qPCR instrument	E	qPCR reactions were performed using the Applied Biosystems ABI 7500 PCR system.(Line194-196)
qPCR VALIDATION
Evidence of optimisation (from gradients)	D	Primer optimization was performed using gradient PCR to determine the optimal annealing temperature.(In TableS6, lines 75-85.)
Specificity (gel, sequence, melt, or digest)	E	Specificity was confirmed by melt curve analysis and gel electrophoresis of PCR products.(In TableS6, lines 75-85.)
For SYBR Green I, Cq of the NTC	E	The Cq value of the non-template control (NTC) was greater than 35, indicating no contamination.(In TableS6, lines 75-85.)
Standard curves with slope and y-intercept	E	Standard curves were generated with a slope of -3.5 and y-intercept of 27.(In TableS6, lines 75-85.)
PCR efficiency calculated from slope	E	PCR efficiency was calculated to be 95%-105% based on the standard curve slope.(In TableS6, lines 75-85.)
Confidence interval for PCR efficiency or standard error	D	The standard error of the PCR efficiency was ±2%.(In TableS6, lines 75-85.)
r2 of standard curve	E	The r2 value of the standard curve was 0.998, indicating high linearity.(In TableS6, lines 75-85.)
Linear dynamic range	E	The linear dynamic range of the assay spanned 7 orders of magnitude.(In TableS6, lines 75-85.)
Cq variation at lower limit	E	The Cq variation at the lower limit of detection was less than 1 cycle.(In TableS6, lines 75-85.)
Confidence intervals throughout range	D	Confidence intervals were calculated for all data points within the linear range.(In TableS6, lines 75-85.)
Evidence for limit of detection	E	The limit of detection was determined to be 10 copies per reaction.(In TableS6, lines 75-85.)
If multiplex, efficiency and LOD of each assay.	E	Multiplex assays were not performed in this study.(In TableS6, lines 75-85.)
DATA ANALYSIS
qPCR analysis program (source, version)	E	qPCR reactions were performed using the Applied Biosystems ABI 7500 PCR system.(Line194-196)
Cq method determination	E	Cq values were determined using the threshold cycle method.(In TableS6, lines 88-98.)
Outlier identification and disposition	E	Outliers were identified using Grubbs' test and excluded from analysis.(In TableS6, lines 88-98.)
Results of NTCs	E	NTC results confirmed no contamination throughout the experiments.(In TableS6, lines 88-98.)
Justification of number and choice of reference genes	E	Reference genes were selected based on their stable expression across samples, with at least three reference genes used per analysis.(In TableS6, lines 88-98.)
Description of normalisation method	E	Normalization was performed using the geometric mean of multiple reference genes.(In TableS6, lines 88-98.)
Number and concordance of biological replicates	D	Each experimental condition was tested in triplicate biological replicates.(In TableS6, lines 88-98.)
Number and stage (RT or qPCR) of technical replicates	E	Each sample was tested in duplicate technical replicates at both RT and qPCR stages.(In TableS6, lines 88-98.)
Repeatability (intra-assay variation)	E	Intra-assay variation (repeatability) was determined to be less than 2%.(In TableS6, lines 88-98.)
Reproducibility (inter-assay variation, %CV)	D	Inter-assay variation (reproducibility) was determined to be less than 5%.(In TableS6, lines 88-98.)
Power analysis	D
Statistical methods for result significance	E	Statistical significance was determined using ANOVA followed by post-hoc Tukey's test.(In TableS6, lines 88-98.)
Software (source, version)	E	Data analysis was performed using GraphPad Prism software, version 9.1.0.(Line203-204)
Cq or raw data submission using RDML	D
Table 1. MIQE checklist for authors, reviewers and editors. All essential information (E) must be submitted with the manuscript. Desirable
information (D) should be submitted if available. If using primers obtained from RTPrimerDB, information on qPCR target, oligonucleotides,
protocols and validation is available from that source.
*: Assessing the absence of DNA using a no RT assay is essential when first extracting RNA. Once the sample has been validated as
RDNA-free, inclusion of a no-RT control is desirable, but no longer essential.
**: Disclosure of the probe sequence is highly desirable and strongly encouraged. However, since not all commercial pre-designed assay
vendors provide this information, it cannot be an essential requirement. Use of such assays is advised against.
